# Supplementary material for: Home-Field Advantage of Litter Decomposition Faded 8 Years after Spruce Forest Clearcutting in Western Germany
Source: MDPI journal article supplement (doi:10.3390/soilsystems6010026), 2022-03-15
Supplement: s1 [file s1]

## Article

# Home-Field Advantage of Litter Decomposition Faded 8 Years after Spruce Forest Clearcutting in Western Germany

Liyan Zhuang <sup>1</sup>, Andrea Schnepf <sup>1</sup>, Kirsten Unger <sup>2</sup>, Ziyi Liang <sup>1,3,\*</sup> and Roland Bol <sup>1</sup>

<sup>1</sup> Forschungszentrum Jülich GmbH, IBG-3 (Agrosphäre), 52428 Jülich, Germany; l.zhuang@fz-juelich.de (L.Z.); a.schnepf@fz-juelich.de (A.S.); r.bol@fz-juelich.de (R.B.)

<sup>2</sup> Institute of Crop Science and Resource Conservation (INRES), Soil Science and Soil Ecology, University of Bonn, Nussallee 13, 53115 Bonn, Germany; kunger@uni-bonn.de

<sup>3</sup> Long-Term Research Station of Alpine Forest Ecosystems, Key Laboratory of Ecological Forestry Engineering, Institute of Ecology and Forestry, Sichuan Agricultural University, Chengdu 611130, China; chn\_liangzy@163.com

\* Correspondence: chn\_liangzy@163.com and z.liang@fz-juelich.de

**Citation:** Zhuang, L.; Schnepf, A.; Unger, K.; Liang, Z.; Bol, R. Home-Field Advantage of Litter Decomposition Faded 8 Years after Spruce Forest Clearcutting in Western Germany. *Soil Syst.* **2022**, *6*, 26. <https://doi.org/10.3390/soilsystems6010026>

Academic Editor: Klaus von Wilpert

Received: 1 February 2022

Accepted: 12 March 2022

Published: 15 March 2022

**Publisher's Note:** MDPI stays neutral with regard to jurisdictional claims in published maps and institutional affiliations.

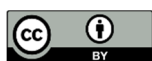

**Copyright:** © 2022 by the authors. Submitted for possible open access publication under the terms and conditions of the Creative Commons Attribution (CC BY) license (<https://creativecommons.org/licenses/by/4.0/>).

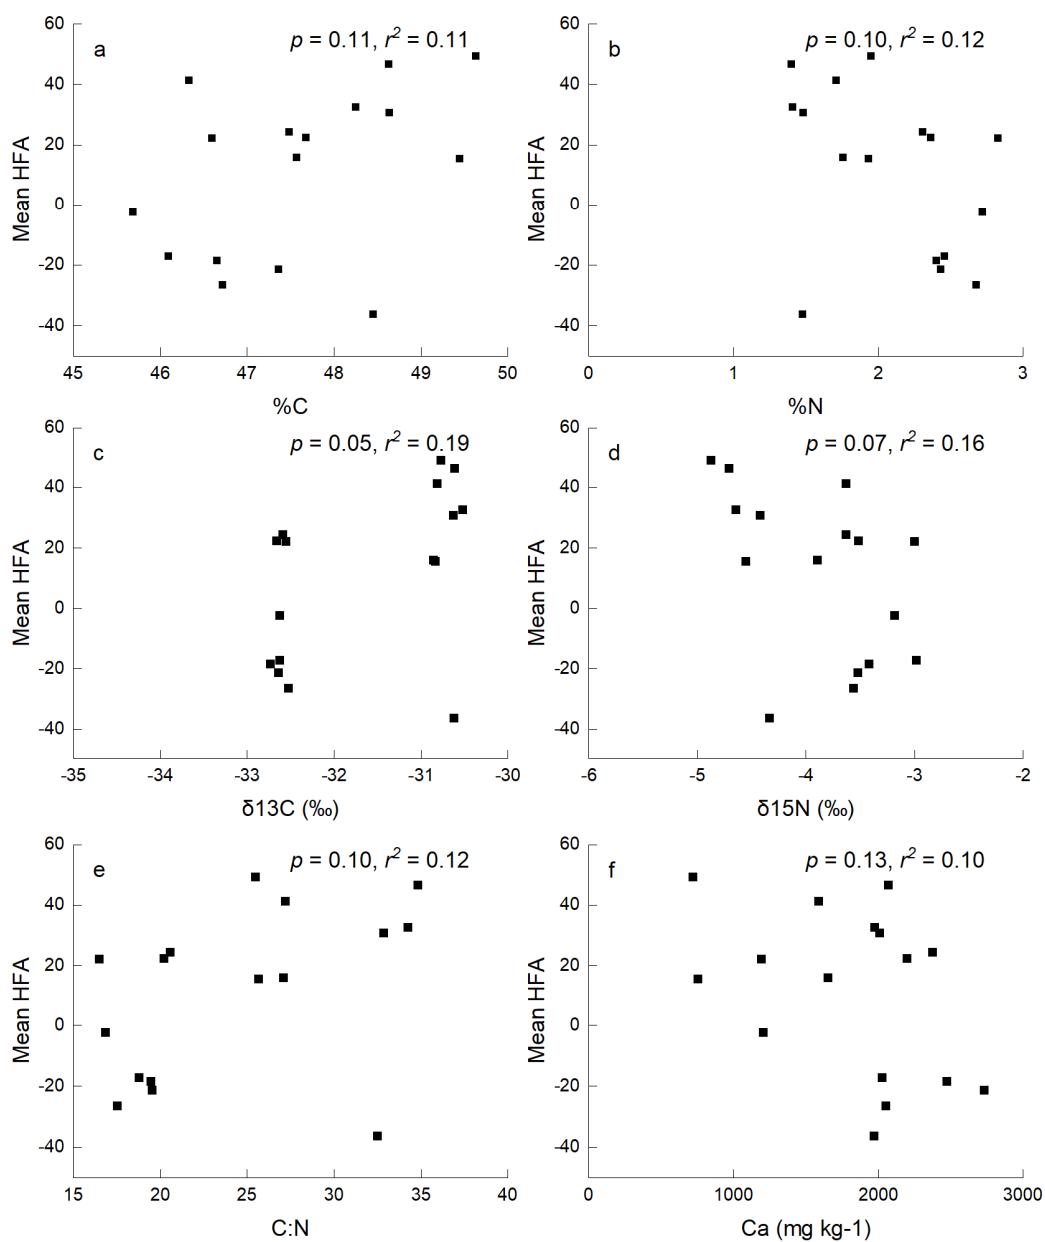

Figure S1. the relationship between total C, N concentrations,  $\delta^{13}\text{C}$ ,  $\delta^{15}\text{N}$ , C:N ratios, Ca and mean HFA.

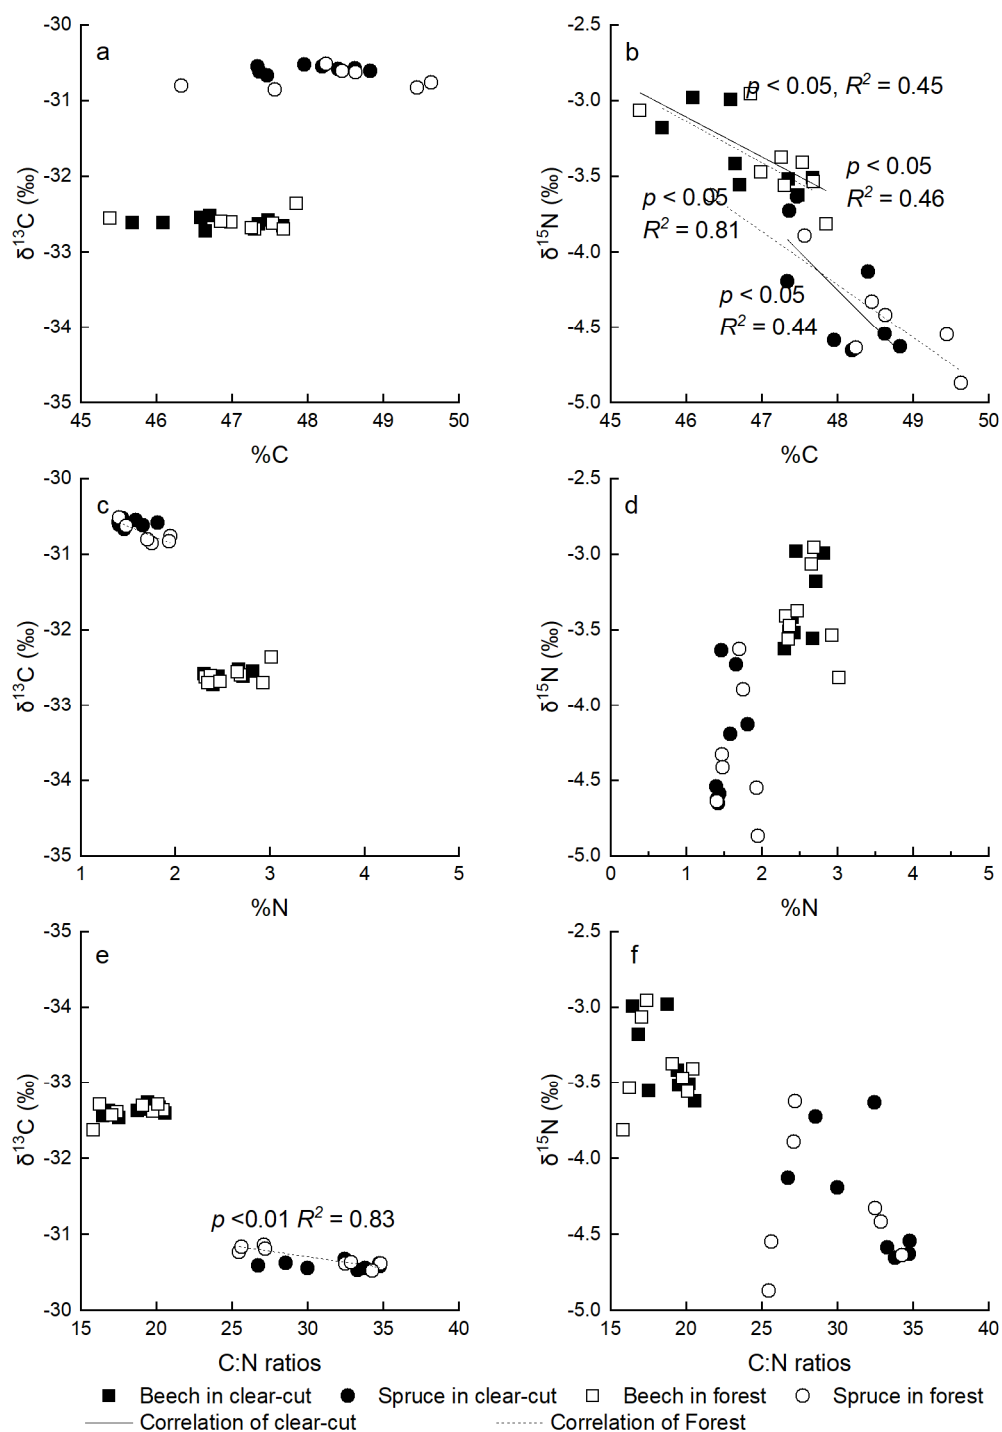

Figure S2. the relationship between the initial litter C, N and C:N ratios on the isotopic  $^{13}\text{C}$  and  $\delta^{15}\text{N}$  value
